# Supplementary material for: Quantifying the biophysical climate change mitigation potential of Canada's forest sector
Source: Copernicus journal article supplement (doi:10.5194/bg-11-3515-2014), 2014-07-03
Supplement: Supplementary file 1 [file 03_Smyth_Biophysical_Mitigation_Supplementary.xlsx]

## Sheet: Table S1
			Alberta	British Columbia	Manitoba	New Brunswick	Newfoundland	Nova Scotia	Northwest Territories	Ontario	Prince Edward Island	Quebec	Saskatchewan	Yukon Territories
	element	unit
Base Case	harvest recovery	merchC utilization (%)	94	85	85	85	85	85	85	90	85	97	85	85
	harvest residue mgmt	piled and burned Percent of area	50	15 (coast)	10	0	0	0	1 to 5a	5 to 10	0	0	0 to 33	15 to 33
				50 (interior)
	salvage harvest	Percent of merchC overall target	7	6	7	1.5	7	7	0	4	0	6	2	75
Better Utilization	harvest recovery	merchC utilization rate	97	97	97	97	97	97	-	92	97	97	97	90
	harvest residue mgmt	recovery for bioenergy: percent of residue C	50	50	50	50	50	50	-	10	10	50	50	50
	harvest residue mgmt	piled and burned Percent of area	0	0	0	0	0	0	-	0	0	0	0	0
	salvage harvest	Percent of merchC target	10	10	10	3.5	10	10	-	6	-	10	5	-
Harvest Less	additional harvest exclusion area	managed forest area (Mha)	1.2	1.5	0.3	0.12	0.3	0.2	-	-	-	2.5	0.2	0.3
	reduction in harvest	Percent of merch C target	5	2	3	5	5	5	-	5	-	5	5	-
Planting	Faster regen.(post-harvest)	Area (kha)	-	-	-	-	-	-	-	-	-	3.586	-	0.069
	Age	Reset age (years)	-	-	-	-	-	-	-	-	-	6	-	6
Better Growth	Increased growth	Approx Area (kha/year)	13	80	1.5	3.888	0.5	2.024	-	16.5	-	18.16	2.147	0.069
	Application age	Age (years)	1 to 35	40 to 49	1 to 35	1 to 10	40 to 49	1 to 10		1 to 10		1 to 10	1 to 10	1 to 10
										40 to 49		40 to 49
	Stand type	Hardwood or Softwood	SW	SW	SW	SW	SW	HW		SW SW		SW SW	SW	SW
	Increase in volume increment	(%)	6	20	10	20	20	20		20		20 20	20	20
										20
	Activity		ISb CRc	Fd	IS	IS CR	F	IS MRe		Various		CR F	IS	IS
Clearcut Bioenergy	increase in harvest	merchC overall target	5	2	3	5	5	5	5	5	5	5	5	5
CT Bioenergy	CT for bioenergy	Merch C target (000m3/ year)	-	2260	-	25	0.5	3.495	-	-	1	518	-	-
PCT Bioenergy	PCT for bioenergy	Area (kha/ year)	-	4.38	-	1.65	0.5	1.528	-	-	-	14.9	-	-
															United States	Japan	Other
HWP Base	bioenergy	% of total harvest	0	0	6.4 to 9.6	0	1.4 to 23.3	0	71.1 to 92.3	8.2 to 17	63 to 71.4	0	3.5 to 4.5	0	0	0	0
	milling efficiency	%	76	76	76	76	76	76	76	76	76	76	76	76	47.4	76.3	76.3
	mill residue capture	%	30	30	30	30	30	30	30	15	30	30	30	30	30	30	30
	sawn wood	% of total products	42	42	42	42	42	42	42	42	42	42	42	42	27.2	32	42
	panels	% of total products	16.2	16.2	16.2	16.2	16.2	16.2	16.2	16.2	16.2	16.2	16.2	16.2	21.6	17.7	16.2
	other solid wood	% of total products	3.6	3.6	3.6	3.6	3.6	3.6	3.6	3.6	3.6	3.6	3.6	3.6	5.1	0.1	3.6
	pulp & paper	% of total products	38.2	38.2	38.2	38.2	38.2	38.2	38.2	38.2	38.2	38.2	38.2	38.2	46.1	50.2	38.2
Long-lived products (LLP)	sawn wood	% of total products(2015, 2016, 2017+)	43.4	43.4	nc	43.4	43.4	43.4	nc	44.9	43.4	43.4	43.4	nc	nc	nc	nc
			44.9	44.9		44.9	44.9	44.9		47.6	44.9	44.9	44.9
			46.2	46.2		46.2	46.2	46.2		50.4	46.2	46.2	46.2
	panels	% of total products(2015, 2016, 2017+)	16.8	16.8	nc	16.8	16.8	16.8	nc	17.3	16.8	16.8	16.8	nc	nc	nc	nc
			17.3	17.3		17.3	17.3	17.3		18.4	17.3	17.3	17.3
			17.9	17.9		17.9	17.9	17.9		19.5	17.9	17.9	17.9
	other solid wood	% of total products(2015, 2016, 2017+)	3.7	3.7	nc	3.7	3.7	3.7	nc	3.8	3.7	3.7	3.7	nc	nc	nc	nc
			3.8	3.8		3.8	3.8	3.8		4	3.8	3.8	3.8
			3.9	3.9		3.9	3.9	3.9		4.3	3.9	3.9	3.9
	pulp & paper	% of total products(2015, 2016, 2017+)	36.1	36.1	nc	36.1	36.1	36.1	nc	34	36.1	36.1	36.1	nc	nc	nc	nc
			34	34		34	34	34		29.9	34	34	34
			32	32		32	32	32		25.8	32	32	32
Bioenergy feedstock	bioenergy	base + x% (2015, 2016, 2017+)	1.67	1.67	nc	1.67	1.67	1.67	3.33	6.67	nc	1.67	1.67	nc	nc	nc	nc
			3.33	3.33		3.33	3.33	3.33	6.67	13.33		3.33	3.33
			5	5		5	5	5	10	20		5	5
Displacement factor	energy	t of C avoided / t of C used	0.42	0.44	0.79	0.76	0.57	0.42	0.56	0.77	0.76	-0.08	0.42	0.43	0.6	0.6	0.6
Displacement factor	sawnwood	t of C avoided / t of C used	0.38	0.38	0.38	0.38	0.38	0.38	0.38	0.38	0.38	0.38	0.38	0.38	0.38	0.38	0.38
Displacement factor	panels	t of C avoided / t of C used	0.77	0.77	0.77	0.77	0.77	0.77	0.77	0.77	0.77	0.77	0.77	0.77	0.77	0.77	0.77
a Range indicates the quantity changes over time
b IS = Improved Seed
c CR = Chemical Release
d F = Fertilization
e MR = Mechanical Release
f nc = No change relative to base
