# Supplementary material for: Quantifying the biophysical climate change mitigation potential of Canada's forest sector
Source: Copernicus journal article supplement (doi:10.5194/bg-11-3515-2014), 2014-07-03
Supplement: Supplementary file 1 [file supplement-cover-letter.pdf › supplement-cover-letter.pdf]

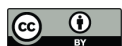

*Supplement of*

## **Quantifying the biophysical climate change mitigation potential of Canada's forest sector**

**C. E. Smyth et al.**

*Correspondence to:* C. E. Smyth ([carolyn.smyth@nrcan.gc.ca](mailto:carolyn.smyth@nrcan.gc.ca))

- Supplement-Cover-Letter.pdf
- 03\_Smyth\_Biophysical\_Mitigation\_Supplementary.xlsx
